# Supplementary material for: Solvothermal synthesis of CoS2–graphene nanocomposite material for high-performance supercapacitors
Source: Royal Society of Chemistry journal article supplement (doi:10.1039/c2jm31214j), 2012-01-01
Supplement: c2jm31214j.pdf [file c2jm31214j.pdf]

# Solvothermal synthesis of CoS<sub>2</sub>/graphene nanocomposite material for high-performance supercapacitors

Bei Wang,<sup>a</sup> Jinsoo Park,<sup>b</sup> Dawei Su,<sup>a</sup> Chengyin Wang<sup>c</sup>, Hyojun Ahn<sup>b</sup>  
and Guoxiu Wang<sup>\*,a,b</sup>

<sup>a</sup> Centre for Clean Energy Technology & School of Chemistry and Forensic Science,  
University of Technology Sydney, City Campus, Broadway, Sydney 2007, Australia

<sup>b</sup> School of Materials Science and Engineering, Gyeongsang National University, 900  
Gazwa-dong Jinju, Gyeongnam 660-701, South Korea

<sup>c</sup> College of Chemistry and Chemical Engineering, Yangzhou University, Yangzhou  
225002, China

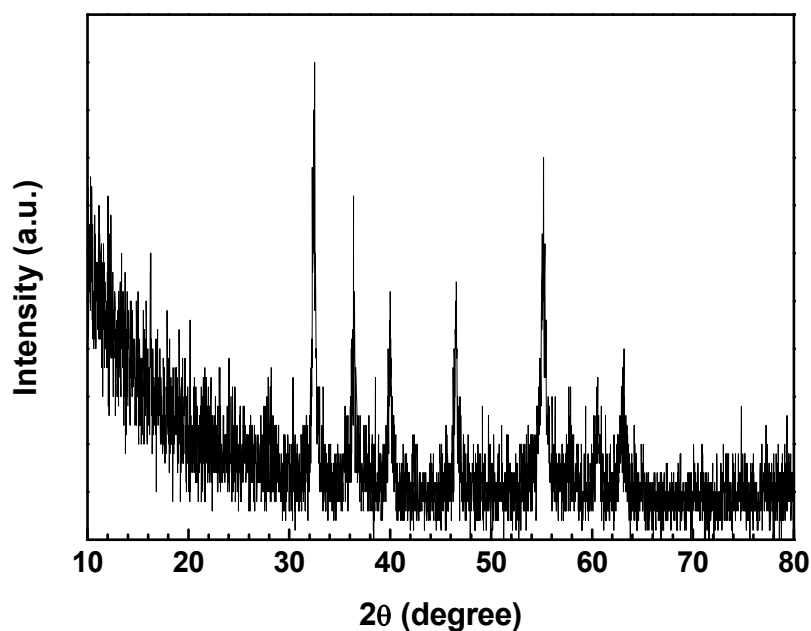

SI-Fig. 1 XRD pattern of the CoS<sub>2</sub> nanoparticles.

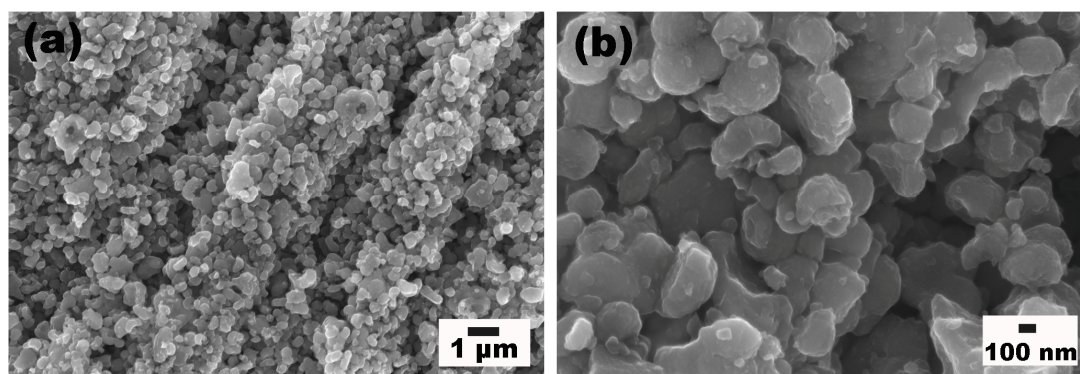

**SI-Fig. 2** (a) low and (b) high magnified SEM images of the CoS<sub>2</sub> nanoparticles.
